# Supplementary material for: Microplasma-assisted rapid, chemical oxidant-free and controllable polymerization of dopamine for surface modification
Source: Royal Society of Chemistry journal article supplement (doi:10.1039/c7py00805h), 2017-01-01
Supplement: c7py00805h1.pdf [file c7py00805h1.pdf]

## **Microplasma-assisted rapid, chemical oxidant-free and controllable polymerization of dopamine for surface modification**

Zhe Wang, Chao Xu, Yuexiang Lu\*, Guoyu Wei, Gang Ye, Taoxiang Sun, Jing Chen\*  
*Institute of Nuclear and New Energy Technology, Collaborative Innovation Center of Advanced Nuclear Energy Technology, Beijing Key Lab of Radioactive Waste Treatment, Tsinghua University, Beijing, People's Republic of China, 100084*

\*Email: luyuexiang@mail.tsinghua.edu.cn, jingxia@mail.tsinghua.edu.cn

## Supplementary Figures and Tables

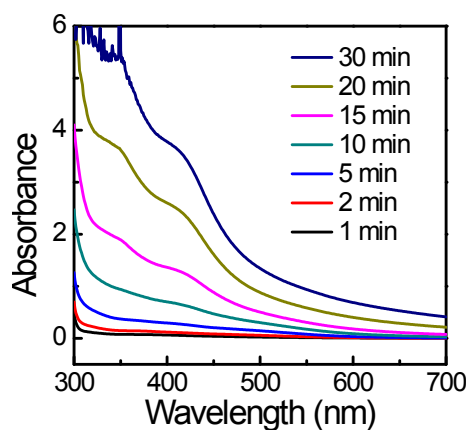

**Fig. S1** UV-Vis spectra of PDA treated by microplasma cathode for different time.

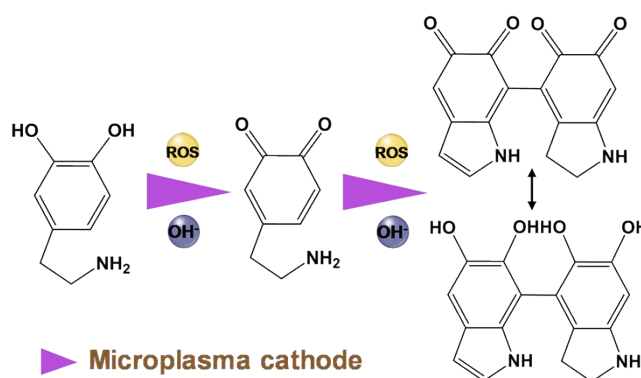

**Fig. S2** The possible polymerization mechanism of dopamine induced by microplasma cathode.

**Table S1.** The pH of dopamine solution after treated by plasma cathode for different time,  $\text{pH}_{\text{initial}}=5$ .

| Time/min | 1    | 2    | 5    | 10   | 15   | 20   | 30   |
|----------|------|------|------|------|------|------|------|
| n        |      |      |      |      |      |      |      |
| pH       | 5.80 | 6.04 | 6.41 | 6.67 | 6.90 | 7.12 | 7.24 |

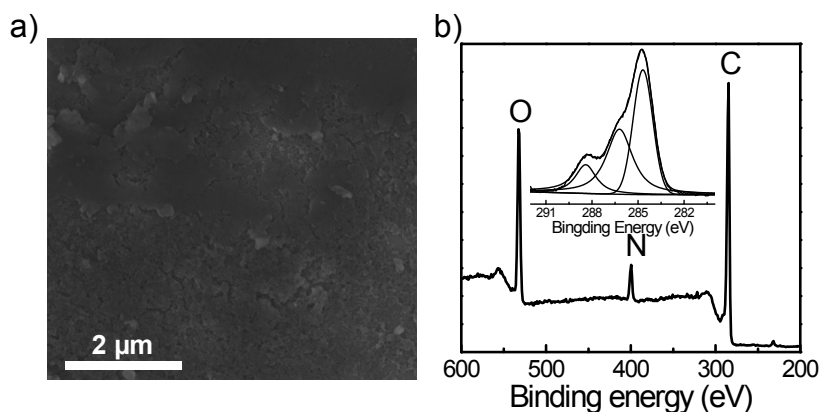

**Fig. S3** (a) SEM image and (b) XPS analysis of PDA coated on silicon wafer.

**Table S2.** XPS analysis (C1s analysis)

|         | Peak binding energy (eV) | PDA (%) |
|---------|--------------------------|---------|
| C-C/C=C | 284.7                    | 43.2    |
| C-N     | 286.2                    | 42.2    |
| C=O     | 288.4                    | 14.6    |

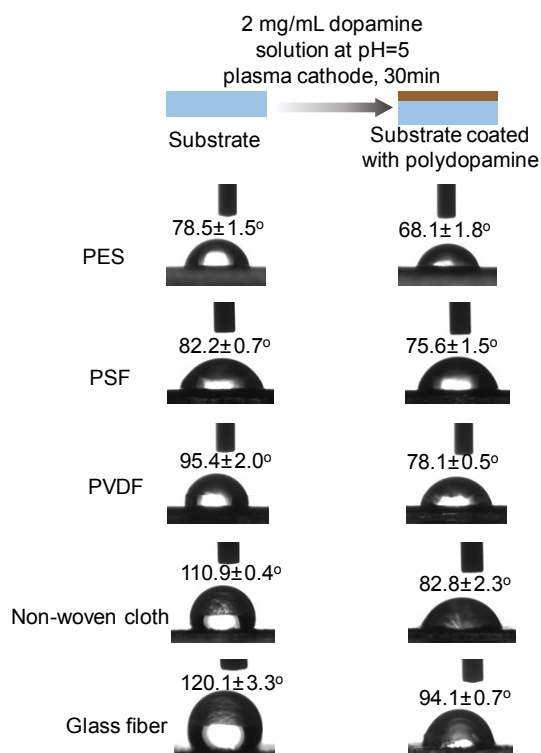

**Fig. S4** The water contact angles before and after the deposition of PDA coating on various substrates. PES: polyether sulfone, PSF: polysulfone, PVDF: polyvinylidene fluoride.

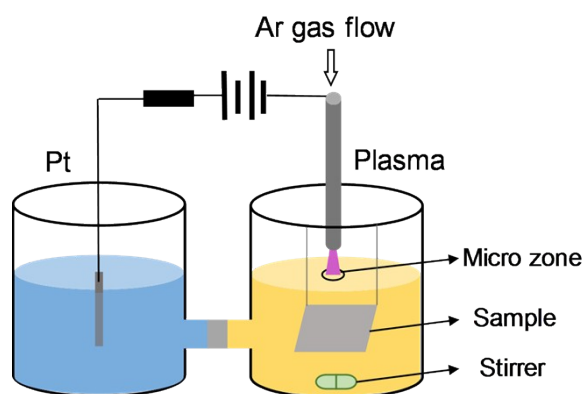

**Fig. S5** Scheme of the “H” type reactor in the preparation of PDA with microplasma method.
